# Supplementary material for: Comparing the Catalytic and Structural Characteristics of a ‘Short’ Unspecific Peroxygenase (UPO) Expressed in Pichia pastoris and Escherichia coli
Source: PubMed Central journal article supplement (PMC10098773; doi:10.1002/cbic.202200558), 2022-11-30
Supplement: CBIC-24-0-s001.pdf [file CBIC-24-0-s001.pdf]

# ChemBioChem

Supporting Information

## **Comparing the Catalytic and Structural Characteristics of a 'Short' Unspecific Peroxygenase (UPO) Expressed in *Pichia pastoris* and *Escherichia coli***

Wendy X. Q. Robinson, Tamara Mielke, Benjamin Melling, Anibal Cuetos, Alison Parkin, William P. Unsworth, Jared Cartwright, and Gideon Grogan\*



## 2. Cloning, Expression and Purification of artUPO Gene in *P. pastoris* (artUPO<sub>yeast</sub>).

>artUPO

```
TCCCAGGATATTGTGGACTTCTCCCAGCATCCGTGGAAGGCACCTGGACCCAACGATCTCCG
CTCCCCCTGTCCCGGACTCAACACGCTCGCGAACCACGGCTTCCTCCCTCGCAACGGTCGAA
ACATCACGATCCCGATGATCGTCCAGGCAGGCTTCGACGGCTACAACGTCCAGCCGGATATC
CTCATTTTGGCAGCCAAGGTGGGATTGCTCACCTCGCCTGAACCCGATACCTTCACCCTCGA
CGATTTGAAGTTGCATGGAACCATCGAGCATGATGCATCGTTGTTCGAGGGAGGACTTCGCGC
TCGGCGATAACCTCCACTTCAACGAGGCGATCTTCAACACCCTCGCAAACCTCGAACCCCTGGT
TCCGATGTCTACAACATCACCTCGGCAGGACAGGTGCTCAAGGACCGCCTCGCCGACTCGCT
CGCCAGGAACCCGAACGTCACGAACACCCGGCAAAGAGTTCACTATCAGGACTTTGGAGTCCG
CCTTCTATCTCTCCGTCATGGGCAACGCAACAACAGGTGAAGCACCCAAAAACTTCGTGCAG
ATTTTCTTCCGAGAGGAGCGGCTCCCCATCGAGGAGGGCTGGAAGAGGTCCACAACCCCTAT
CACGTCGGACACGTTGAACCCCATTCGAGGCCAGATTTTCGGAGGCGTCGAACTGGAAGCCCA
ACCCCGACCAGTGTCCCTGGATCGTCCTCTCGCCCAACTTG
```

**Figure S2.** Gene encoding artUPO for expression in *Pichia pastoris*.

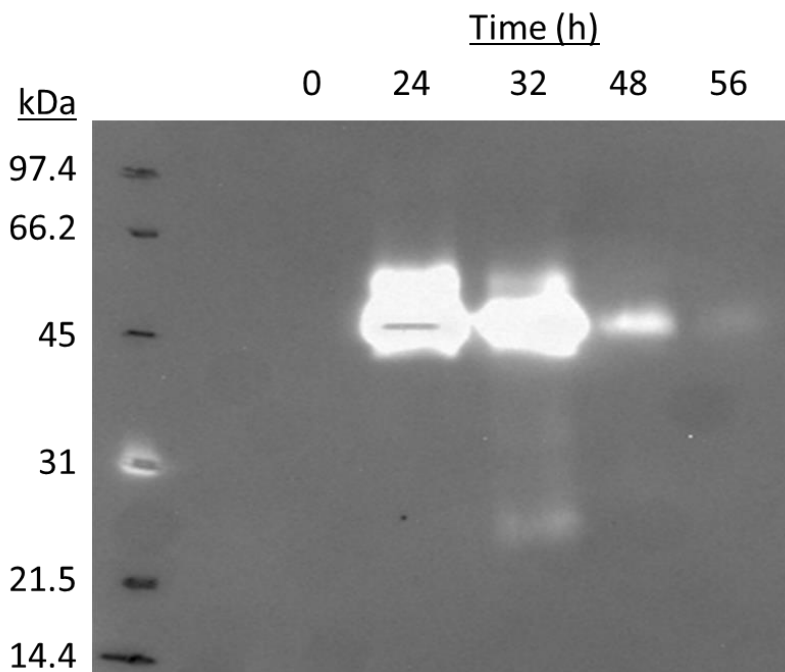

**Figure S3.** Expression of artUPO<sub>yeast</sub> in *Pichia pastoris* sampled at intervals and analysed by Western blot against anti-His as described above in section S2.

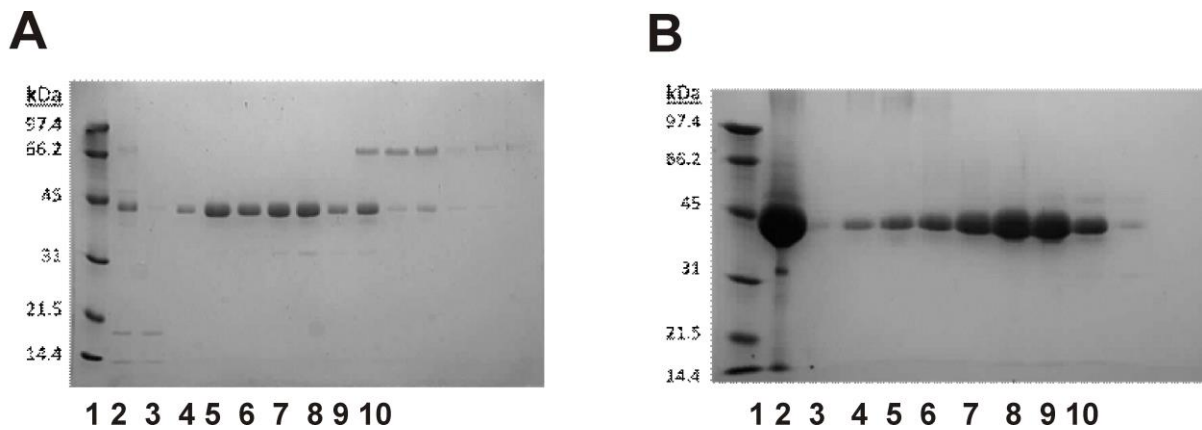

**Figure S4.** Purification of artUPO<sub>yeast</sub>. **A:** SDS-PAGE analysis of fractions from MonoQ anion exchange column of artUPO. Lane 1 – low MW markers; 2: loaded protein sample; 3-10 fractions of MonoQ column; **B:** SDS-PAGE analysis of fractions from size exclusion chromatography of artUPO using a 16/600 Superdex 75 column. Lane 1 – low MW markers; 2: loaded protein sample; 3-10 fractions of SEC column.

### 3. Expression and Purification of artUPO Gene in *E. coli* (artUPO<sub>bact</sub>).

The gene sequence of artUPO was codon optimised and the following sequence ordered from GeneArt inserted into pET-28a(+) (**Figure S5**).

```

ATGAGCCAGGACATCGTGGATTTTAGCCAACATCCGTGGAAAGCGCCGGGTCCGAACGACCT
GCGTAGCCCGTGCCCGGGTCTGAACACCCTGGCGAACCACGGTTTCCTGCCGCGTAACGGCC
GTAACATCACCATTCCGATGATCGTGCAGGCGGGTTTTGACGGCTACAACGTTCAACCGGAT
ATCCTGATTCTGGCGGCGAAGGTTGGTCTGCTGACCAGCCCGGAGCCGGACACCTTCACCCT
GGACGATCTGAAACTGCACGGTACCATTGAGCACGATGCGAGCCTGAGCCGTGAAGACTTTG
CGCTGGGCGATAACCTGCACTTCAACGAAGCGATCTTTAACACCCTGGCGAACAGCAACCCG
GGTAGCGATGTGTACAACATTACCAGCGCGGGCCAGGTTCTGAAGGACCGTCTGGCGGATAG
CCTGGCGCGTAACCCGAACGTGACCAACACCGGCAAAGAGTTCACCATTTCGTACCCTGGAAA
GCGCGTTTTATCTGAGCGTGATGGGTAACGCGACCACCGGTGAAGCGCCGAAGAACTTTGTT
CAAATCTTCTTTTCGTGAGGAACGTCTGCCGATTGAGGAAGGTTGGAAACGTAGCACCACCC
GATCACCAGCGACACCCTGAACCCGATTGCGGGTCAGATTAGCGAAGCGAGCAACTGGAAAC
CGAACCCGGATCAATGCCCGTGGATTGTTCTGAGCCCGAACCTGTAA

```

**Figure S5.** Gene encoding artUPO codon optimized for expression in *E. coli*.

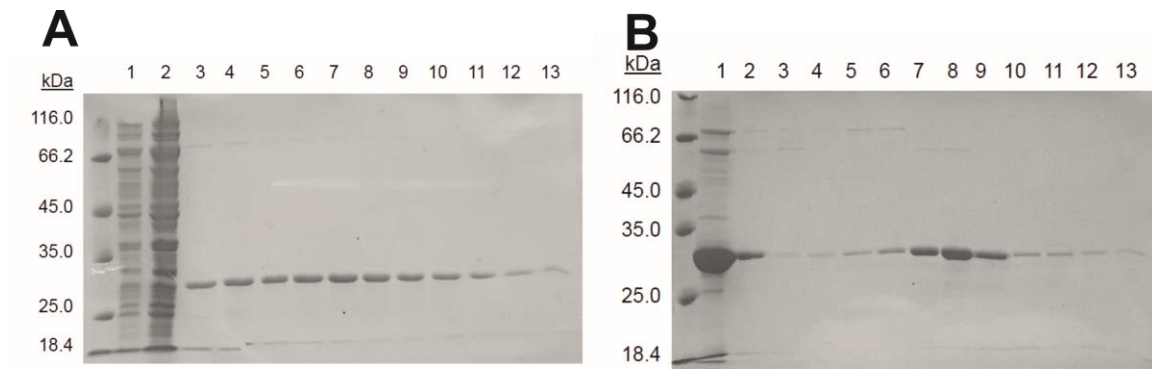

**Figure S6. A:** Fractions of NiNTA column used to isolate artUPO<sub>bact</sub>. Lanes 1 and 2 correspond to flow through fractions; Lanes 3-13 correspond to successive fractions analysed over the A<sub>280</sub> peak; **B:** Fractions of SEC column used to isolate artUPO<sub>bact</sub>.; Lanes 1-13 correspond to successive fractions analysed over the A<sub>280</sub> peak.

#### 4. Determination of Kinetic Constants

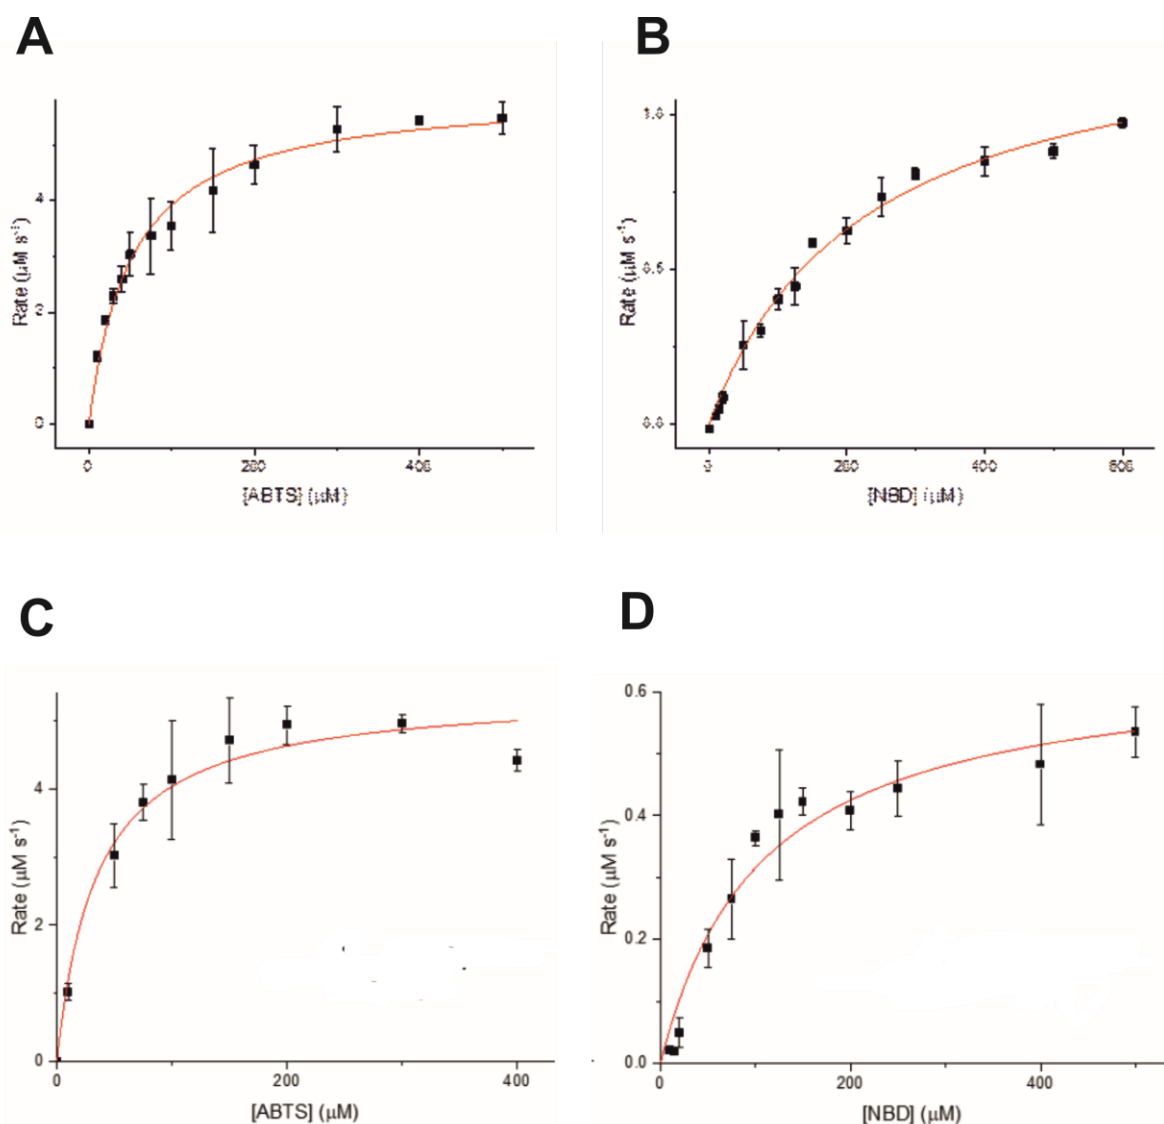

**Figure S7.** Determination of kinetic constants for peroxidase and peroxygenase activity of  $\text{artUPO}_{\text{yeast}}$  with **A:** ABTS and **B:** NBD as substrates and  $\text{artUPO}_{\text{bact}}$  with **C:** ABTS and **D:** NBD as substrates. Kinetic constants can be found in manuscript **Table 1**.

#### 5. Analytical Size Exclusion Experiments

The oligomeric nature of native  $\text{artUPO}_{\text{yeast}}$  and  $\text{artUPO}_{\text{bact}}$  was compared using analytical size exclusion on a Superdex™ 200 Increase 10/300 GL column using 200  $\mu\text{L}$  of enzyme at 1  $\text{mg mL}^{-1}$  in 10 mM potassium phosphate pH 7.4, containing 150 mM NaCl at a flow rate of 0.75  $\text{mL min}^{-1}$ . Elution profiles were compared to a protein

standard mix (69385 Protein Standard Mix 15, Sigma Aldrich) run on the same column in the same conditions (**Figure S8**).

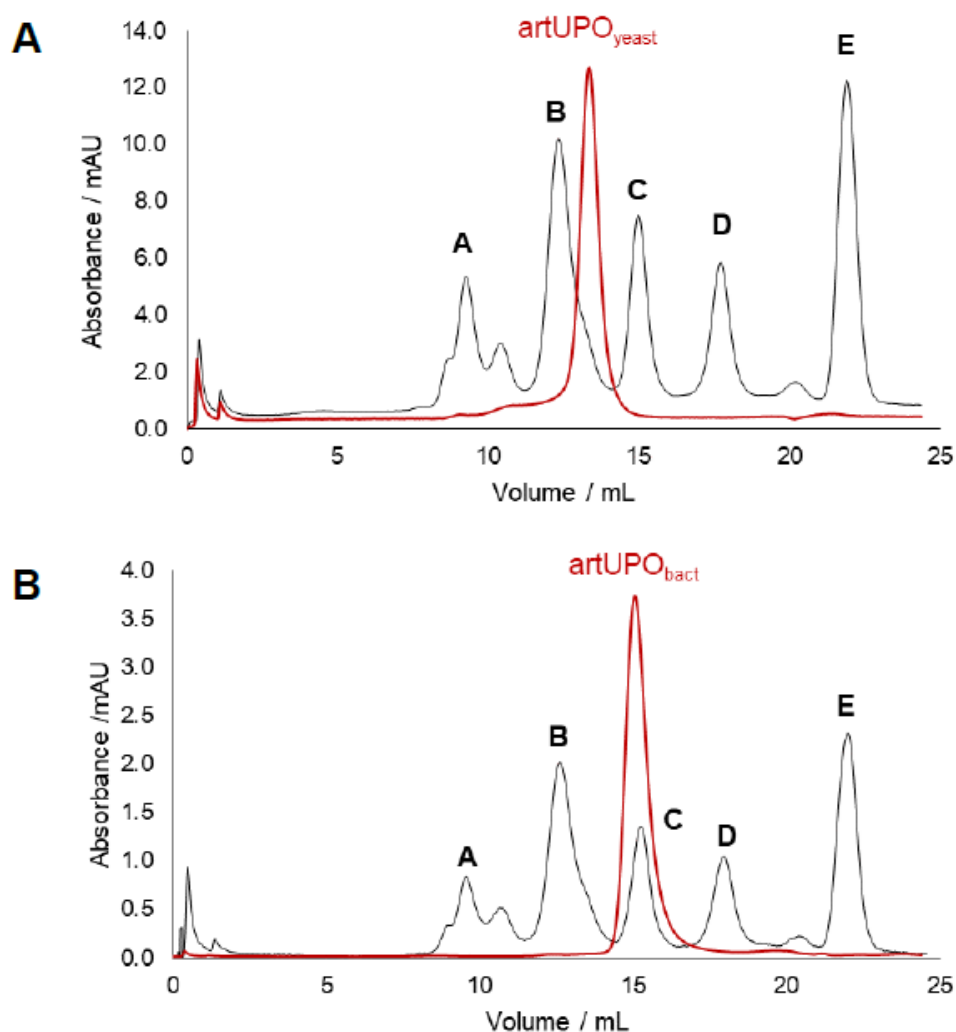

**Figure S8.** Analytical SEC chromatograms for **A.** artUPO<sub>yeast</sub> and **B.** artUPO<sub>bact</sub>. (red traces). Standards (black trace) are: **A:** Thyroglobulin 670.0 kDa; **B:**  $\gamma$ -globulins from bovine blood 150.0 kDa; **C:** Albumin chicken egg grade VI (ovalbumin) 44.3 kDa; **D:** Ribonuclease A type I-A from bovine pancreas 13.7 kDa; **E:** *p*-aminobenzoic acid (pABA).

## 6. Crystallisation

### artUPO<sub>yeast</sub>

Purified artUPO<sub>yeast</sub> was concentrated to 60 mg mL<sup>-1</sup> in 50 mM Tris pH 8.0, 300 mM NaCl and 10% w/v glycerol. Initial crystallisation screens were set up in 96 well 2 drop

plates, using a Mosquito robot, which contained either 1:1 or 1:2 ratio of protein to buffer in a sitting drop with a total volume of 300 nL. The best initial crystals were obtained from conditions containing 0.2 M calcium chloride dihydrate and 20% (w/v) PEG 3350 at pH 5.1. These gave a dataset in the  $P2_12_12_1$  space group. Further crystals were obtained in conditions containing 0.15 M KSCN, 25% PEG MME 2000 with no buffer. These gave a higher resolution dataset in the  $C222_1$  space group.

### **artUPO<sub>bact</sub>**

Purified artUPO<sub>bact</sub> at a concentration of 15 mg mL<sup>-1</sup> in the size exclusion buffer (10 mM Tris-HCl with 300 mM NaCl, and 10% (v/v) glycerol) was similarly subjected to crystal trials. The best crystals were obtained in 0.1 M HEPES pH 7.5 with 25% (w/v) PEG 3350 and these were harvested without further optimisation for data collection.



## 7. Data collection, structure solution and refinement

**Table S1.** Data Collection and Refinement Statistics for artUPO. Numbers in brackets refer to data for highest resolution shells.

|                                                            | artUPO <sub>yeast</sub> ; <i>P</i> 2 <sub>1</sub> 2 <sub>1</sub> 2 <sub>1</sub> | artUPO <sub>yeast</sub> ; <i>C</i> 222 <sub>1</sub>                          | artUPO <sub>bact</sub>                                                       |
|------------------------------------------------------------|---------------------------------------------------------------------------------|------------------------------------------------------------------------------|------------------------------------------------------------------------------|
| Beamline                                                   | Diamond I03                                                                     | Diamond I04-1                                                                | Diamond I03                                                                  |
| Wavelength (Å)                                             | 0.976254                                                                        | 0.915870                                                                     | 0.976230                                                                     |
| Resolution (Å)                                             | 50.57-2.01 (2.06-2.01)                                                          | 77.27-1.21 (1.23-1.21)                                                       | 39.34-2.09 (2.15-2.09)                                                       |
| Space Group                                                | <i>P</i> 2 <sub>1</sub> 2 <sub>1</sub> 2 <sub>1</sub>                           | <i>C</i> 2 2 2 <sub>1</sub>                                                  | <i>P</i> 2 <sub>1</sub> 2 <sub>1</sub> 2 <sub>1</sub>                        |
| Unit cell (Å)                                              | a = 50.34; b = 75.82; c =<br>151.70<br><br>$\alpha = \beta = \gamma = 90.00$    | A = 50.85; b = 74.17; c =<br>154.54<br><br>$\alpha = \beta = \gamma = 90.00$ | A = 46.03; b = 58.81; c =<br>151.46<br><br>$\alpha = \beta = \gamma = 90.00$ |
| No. of molecules in the asymmetric unit                    | 2                                                                               | 1                                                                            | 2                                                                            |
| Unique reflections                                         | 39554 (2861)                                                                    | 89172 (4348)                                                                 | 25200 (1910)                                                                 |
| Completeness (%)                                           | 99.9 (99.9)                                                                     | 99.9 (100.0)                                                                 | 100.0 (100.0)                                                                |
| <i>R</i> <sub>merge</sub> (%)                              | 0.08 (0.50)                                                                     | 0.04 (0.43)                                                                  | 0.12 (0.77)                                                                  |
| <i>R</i> <sub>p.i.m.</sub>                                 | 0.04 (0.28)                                                                     | 0.02 (0.28)                                                                  | 0.05 (0.32)                                                                  |
| Multiplicity                                               | 8.0 (7.8)                                                                       | 7.7 (6.3)                                                                    | 11.4 (12.7)                                                                  |
| $\langle I/\sigma(I) \rangle$                              | 16.5 (4.4)                                                                      | 23.6 (3.8)                                                                   | 12.8 (3.1)                                                                   |
| Overall <i>B</i> factor from Wilson plot (Å <sup>2</sup> ) | 20                                                                              | 11                                                                           | 28                                                                           |
| <i>CC</i> <sub>1/2</sub>                                   | 1.00 (0.96)                                                                     | 1.00 (0.92)                                                                  | 1.00 (0.94)                                                                  |
| <i>R</i> <sub>cryst</sub> / <i>R</i> <sub>free</sub> (%)   | 19.0/22.6                                                                       | 15.0/16.6                                                                    | 18.9/23.7                                                                    |
| r.m.s.d 1-2 bonds (Å)                                      | 0.009                                                                           | 0.019                                                                        | 0.008                                                                        |
| r.m.s.d 1-3 angles (°)                                     | 1.62                                                                            | 2.18                                                                         | 1.51                                                                         |
| Avge main chain <i>B</i> (Å <sup>2</sup> )                 | 29                                                                              | 13                                                                           | 32                                                                           |
| Avge side chain <i>B</i> (Å <sup>2</sup> )                 | 32                                                                              | 16                                                                           | 34                                                                           |
| Avge water <i>B</i> (Å <sup>2</sup> )                      | 34                                                                              | 17                                                                           | 31                                                                           |

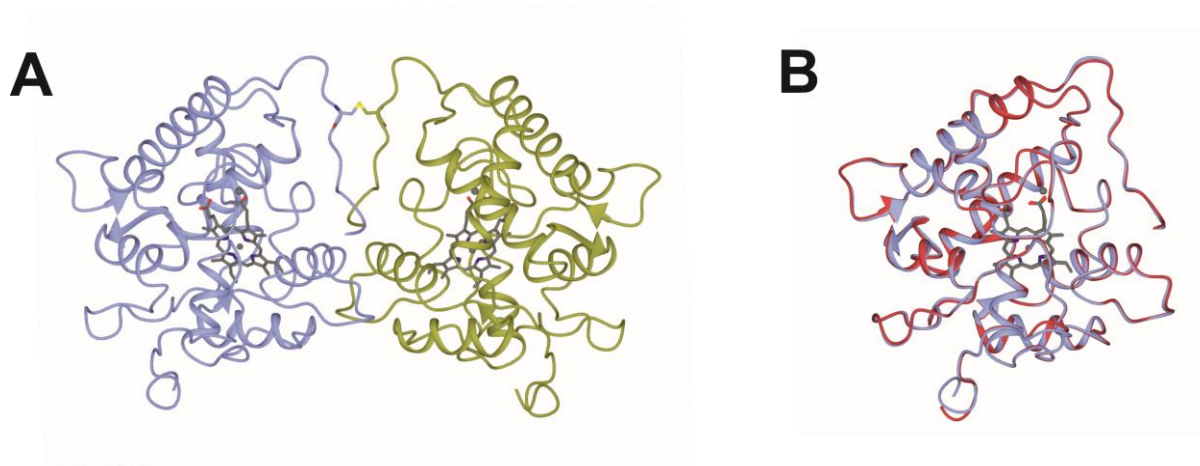

**Figure S9.** **A:** Structure of artUPO<sub>bact</sub> dimer with monomers shown in blue and gold; **B:** Superimposition of monomers of artUPO<sub>bact</sub> and artUPO<sub>yeast</sub> shown in blue and red respectively.

## 8. NanoDSF (Nano Differential Scanning Fluorimetry)

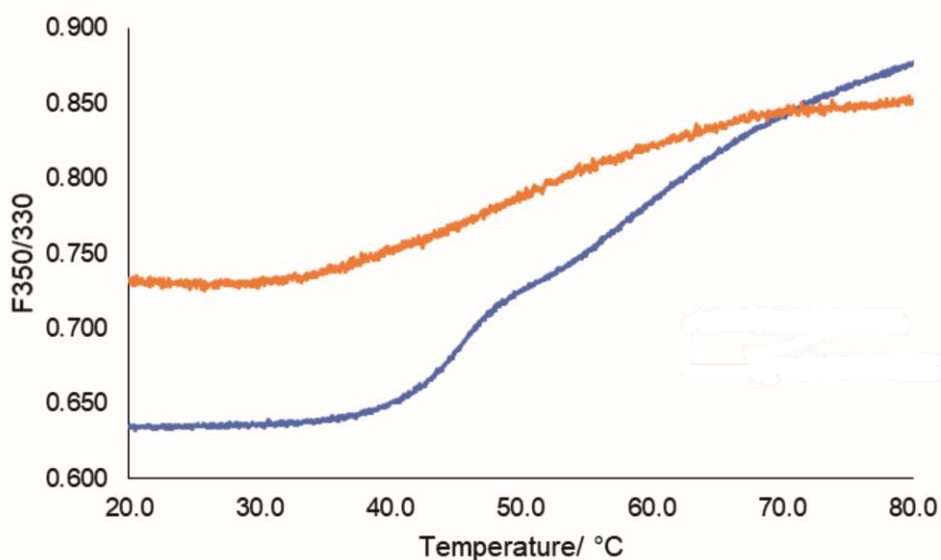

**Figure S10.** Nano-DSF analysis of artUPO<sub>yeast</sub> (blue line) and artUPO<sub>bact</sub> (orange). The ratio of the fluorescence at 350 nm and 330 nm was measured against a temperature gradient of 20–80 °C using 2 mg mL<sup>-1</sup> of each enzyme.

## 9. GC Analysis

**Table S2.** Conditions for chiral separations of oxygenation products.

| Compound  | Column      | Conditions        | Retention Times of Enantiomers (min) |
|-----------|-------------|-------------------|--------------------------------------|
| <b>15</b> | Betadex 120 | 120 °C isothermal | 6.65 and 7.07                        |
| <b>16</b> | Betadex 120 | 120 °C isothermal | 12.00 and 13.24                      |
| <b>17</b> | Betadex 120 | 120 °C isothermal | 10.40 and 10.76                      |
| <b>18</b> | Betadex 120 | 120 °C isothermal | 9.94 and 10.40                       |
| <b>19</b> | Betadex 120 | 120 °C isothermal | 7.35 and 7.71                        |
| <b>20</b> | Betadex 120 | 120 °C isothermal | 22.18 and 23.75                      |
| <b>21</b> | Betadex 120 | 120 °C isothermal | 28.36 and 27.40                      |
| <b>26</b> | BGB 175     | 180 °C isothermal | 5.33 and 5.86                        |
| <b>27</b> | BGB 175     | 180 °C isothermal | 5.37 and 5.65<br>(4.21 and 4.42)*    |
| <b>28</b> | BGB 175     | 180 °C isothermal | 4.29 and 4.73                        |
| <b>29</b> | BGB 175     | 180 °C isothermal | 10.54 and 11.32                      |

\*The determination of the ee of **27** using artUPO<sub>bact</sub> was conducted with a new BGB175 column, with adjusted retention times for enantiomers using the same conditions, as indicated.

## 10. Chiral GC Traces

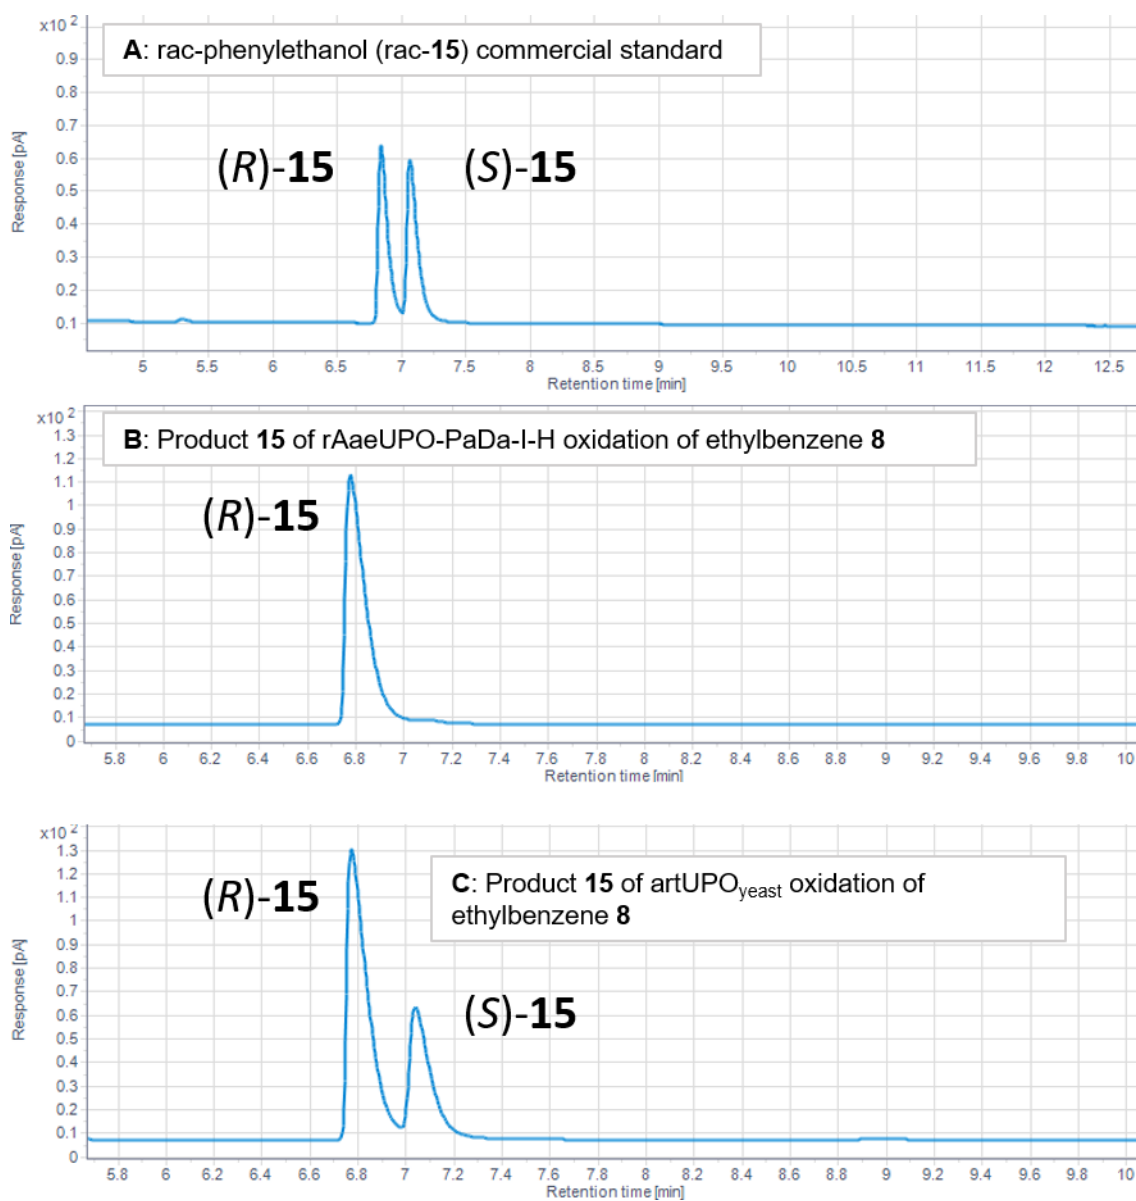

**Figure S11.** Chiral separation of enantiomers of **15**.

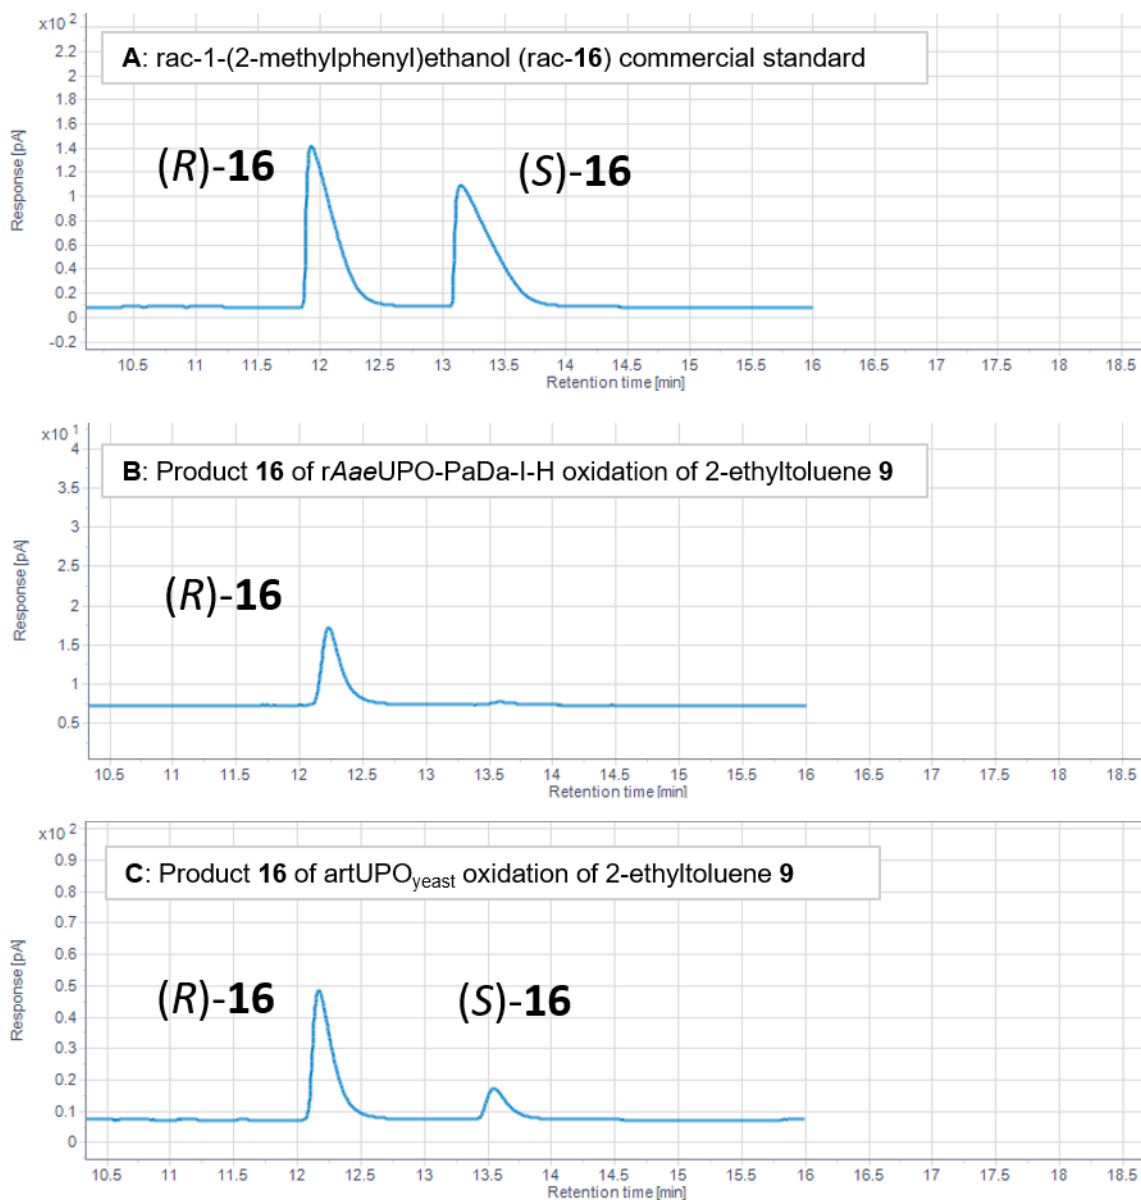

**Figure S12.** Chiral separation of enantiomers of **16**.

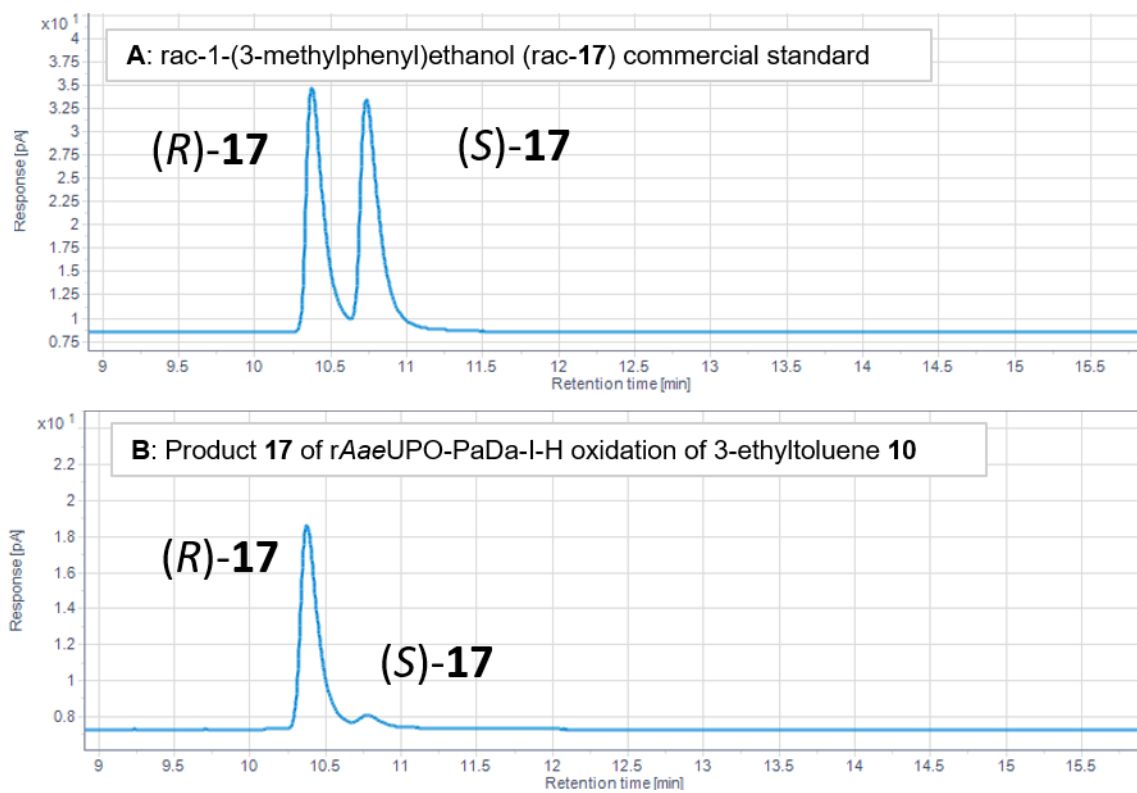

**Figure S13.** Chiral separation of enantiomers of **17**.

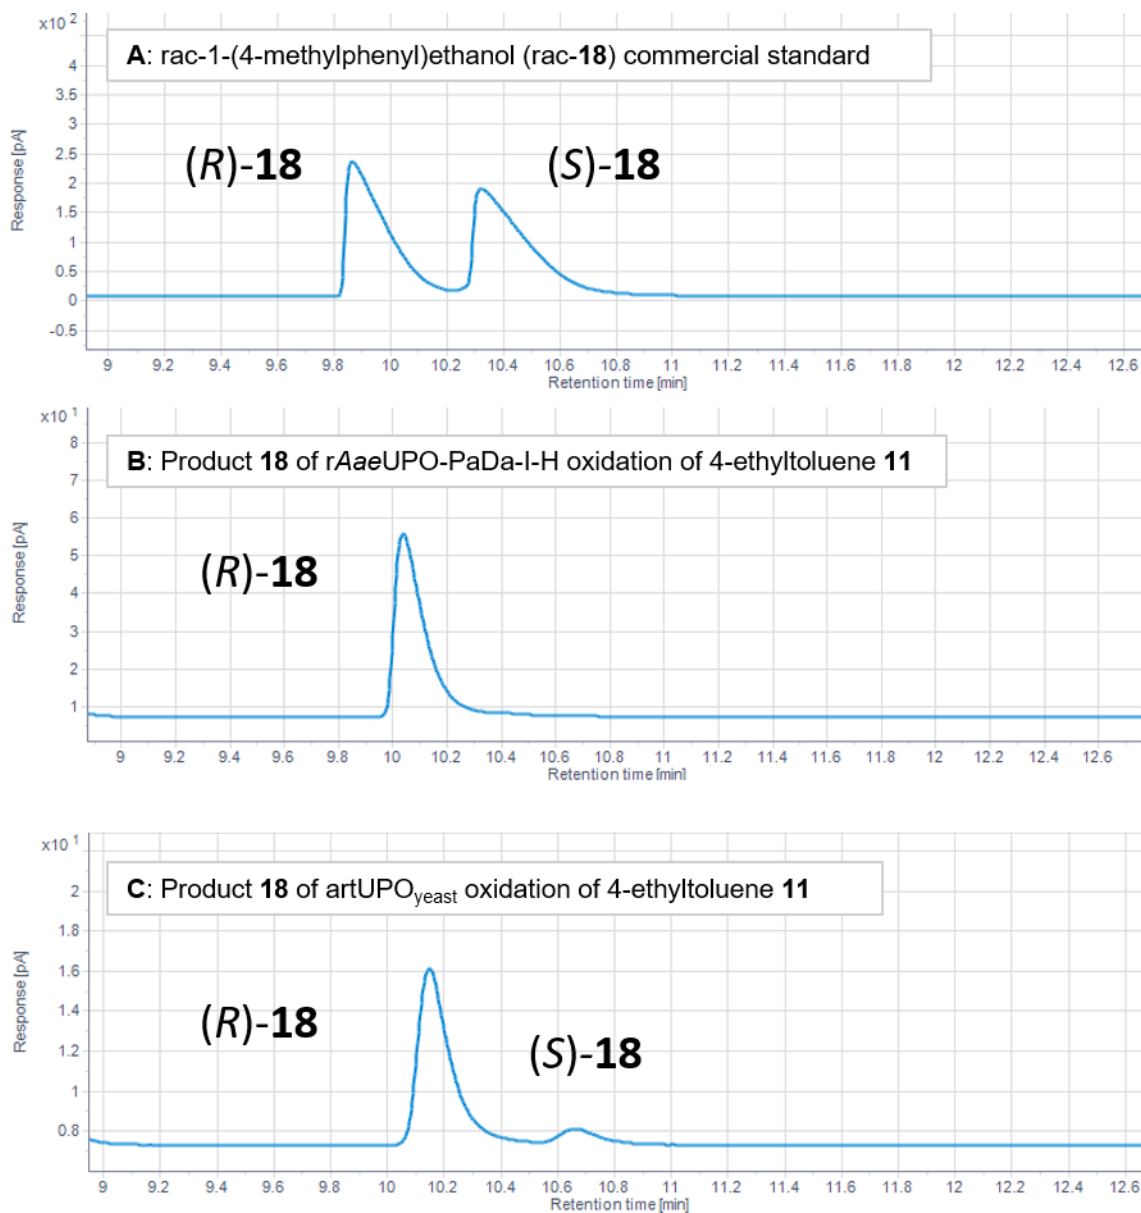

**Figure S14.** Chiral separation of enantiomers of **18**.

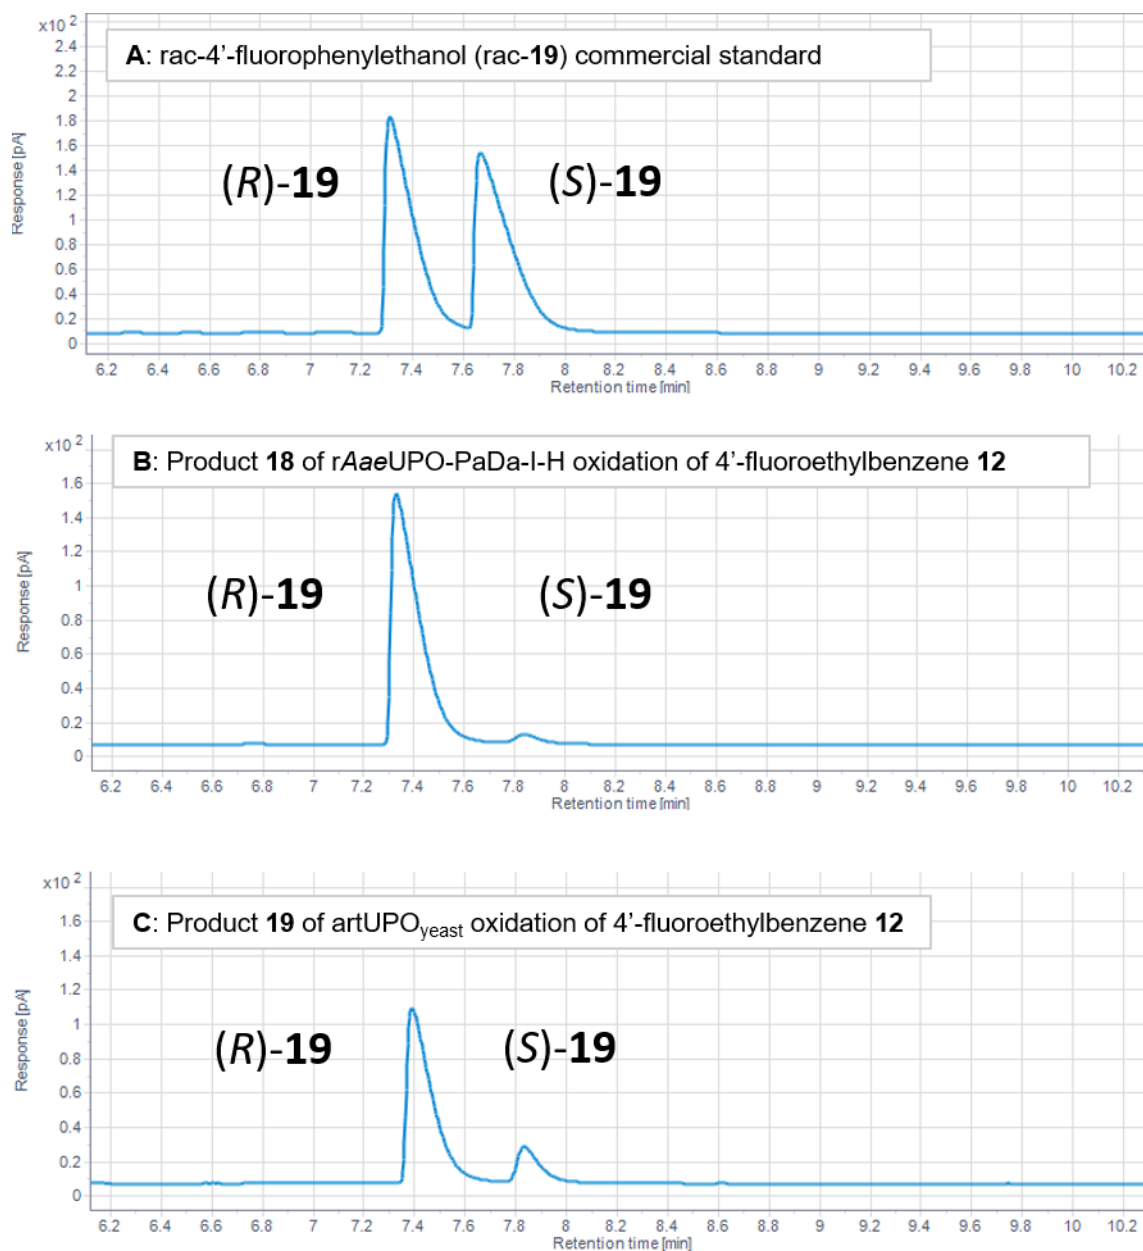

**Figure S15.** Chiral separation of enantiomers of **19**.



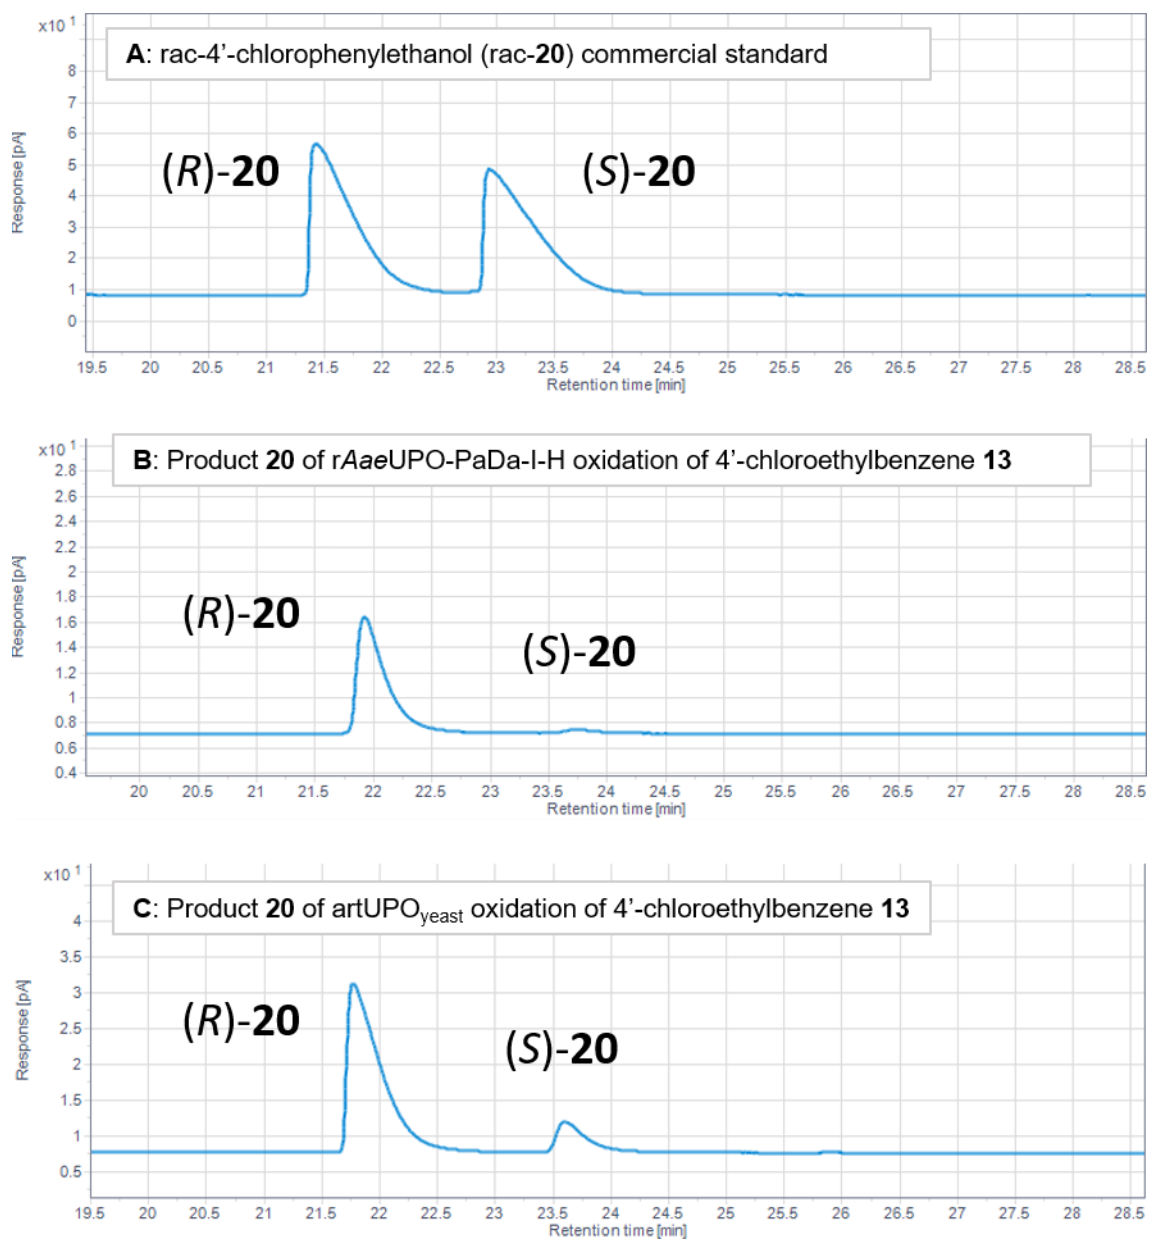

**Figure S16.** Chiral separation of enantiomers of **20**.

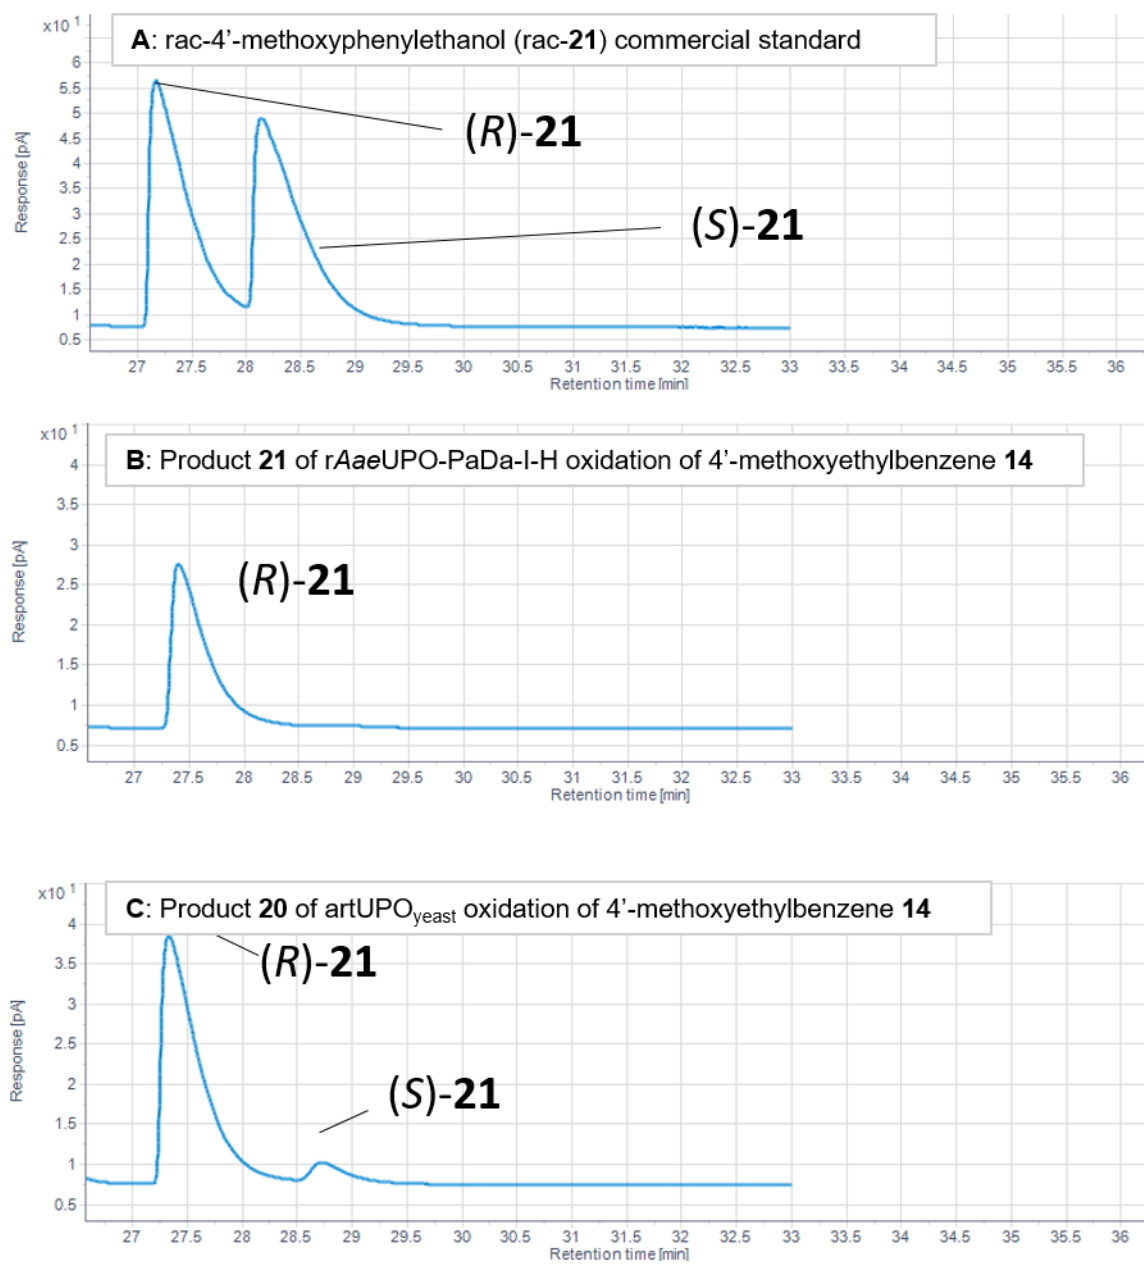

**Figure S17.** Chiral separation of enantiomers of **21**.

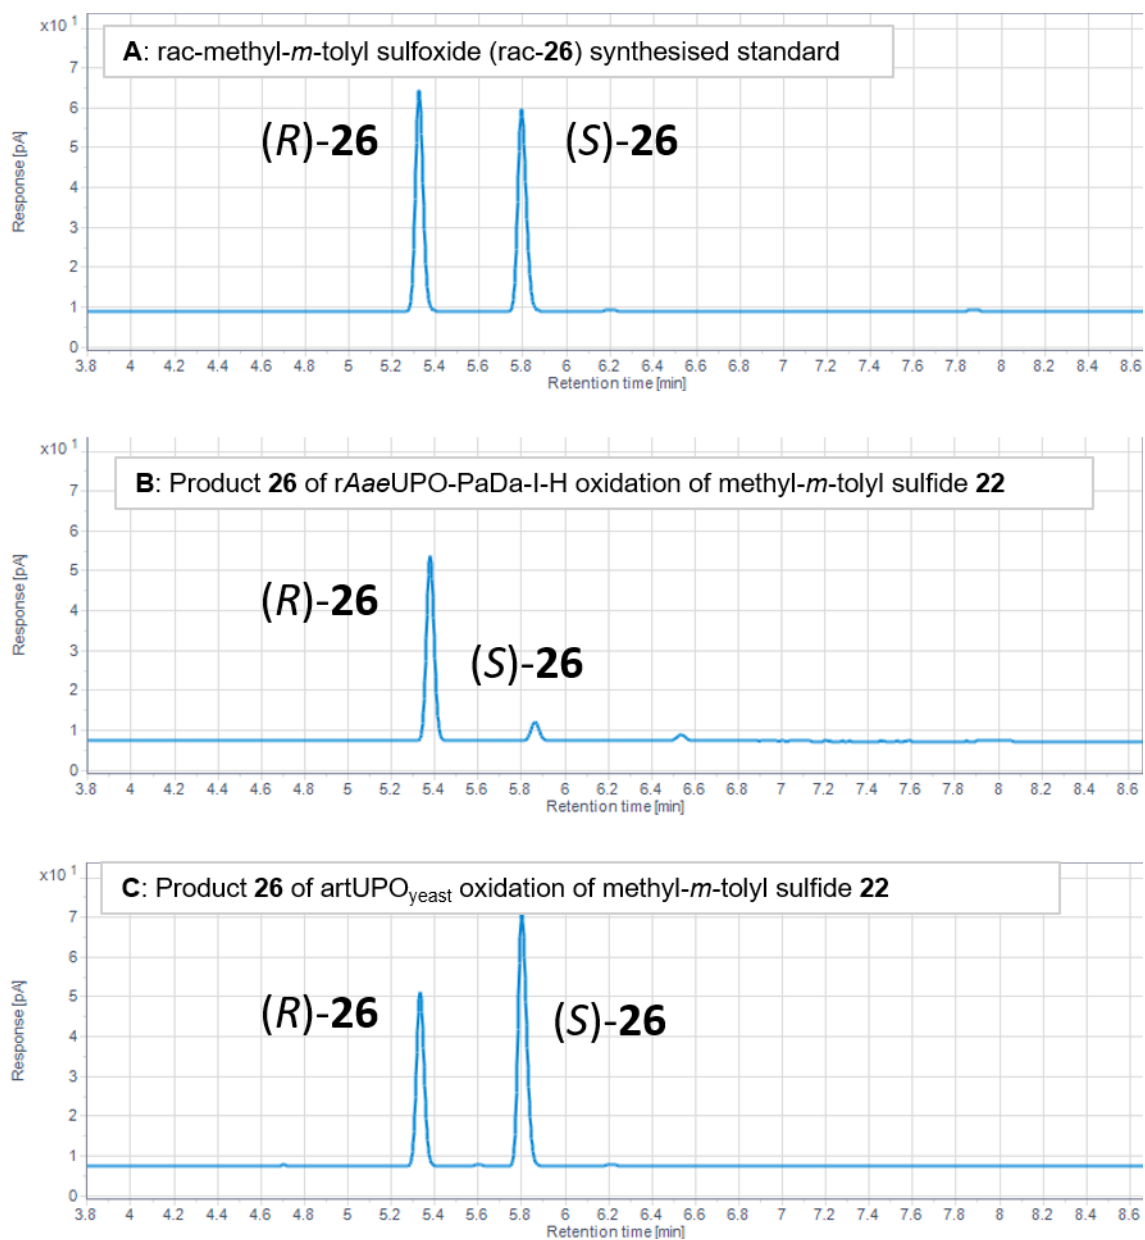

**Figure S18.** Chiral separation of enantiomers of **26**.

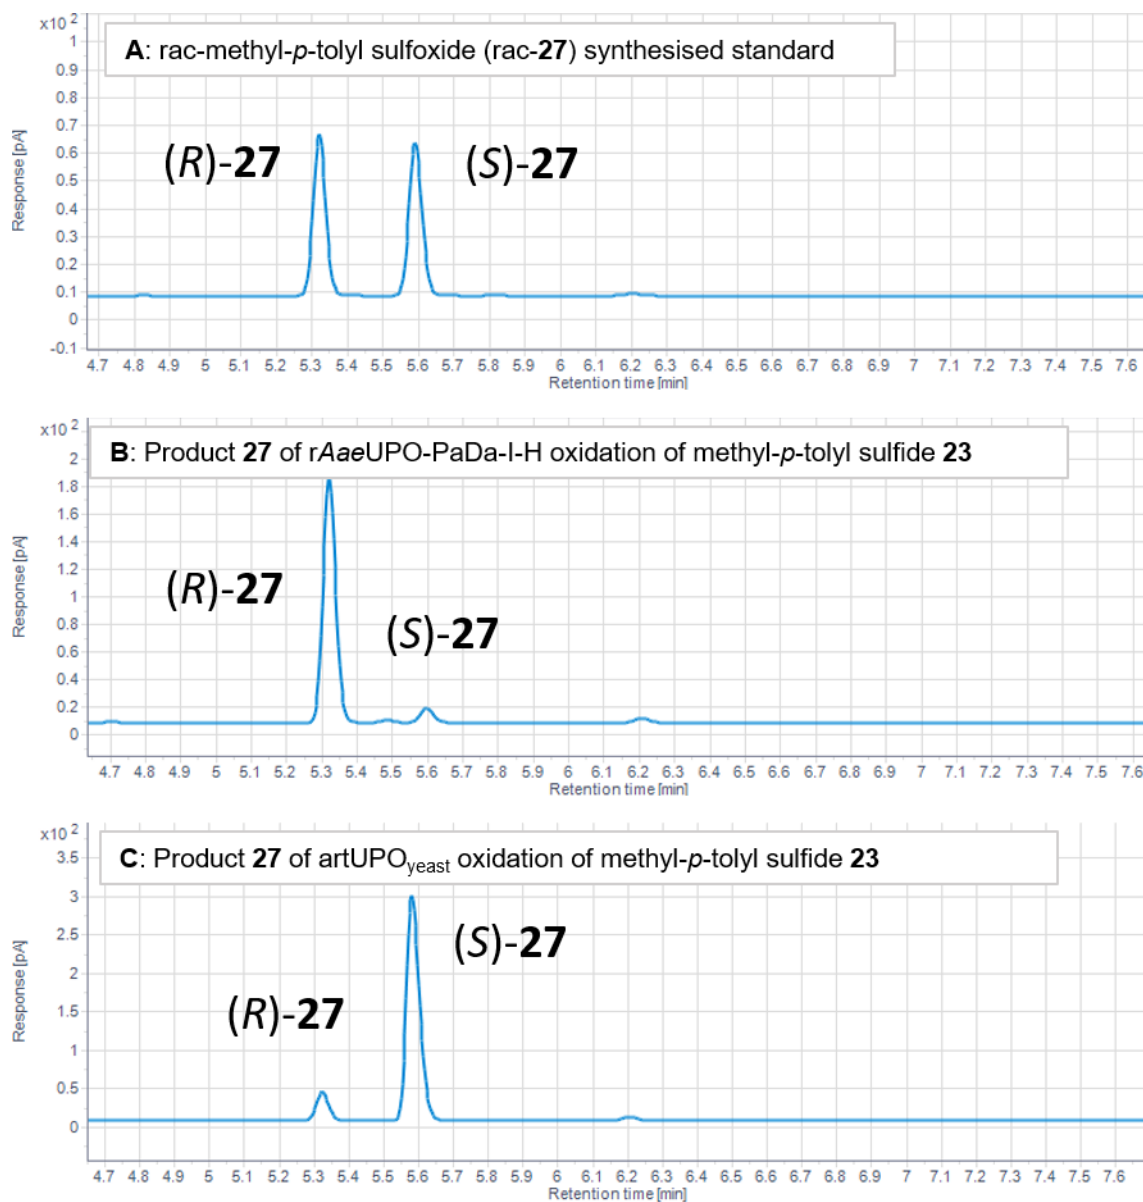

**Figure S19.** Chiral separation of enantiomers of 27.

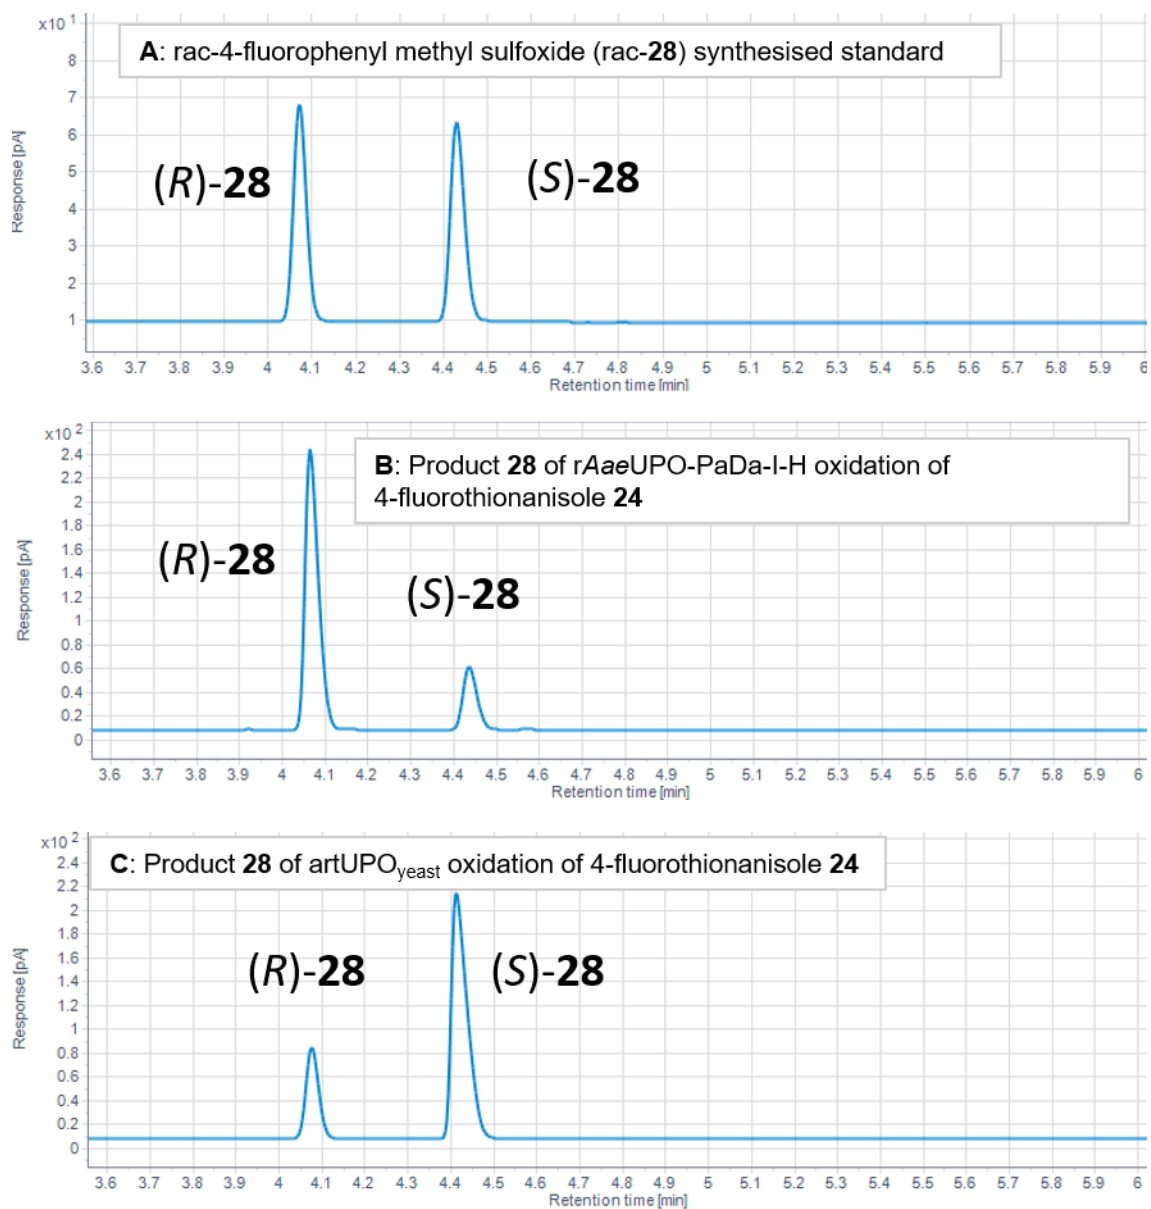

**Figure S20.** Chiral separation of enantiomers of **28**.

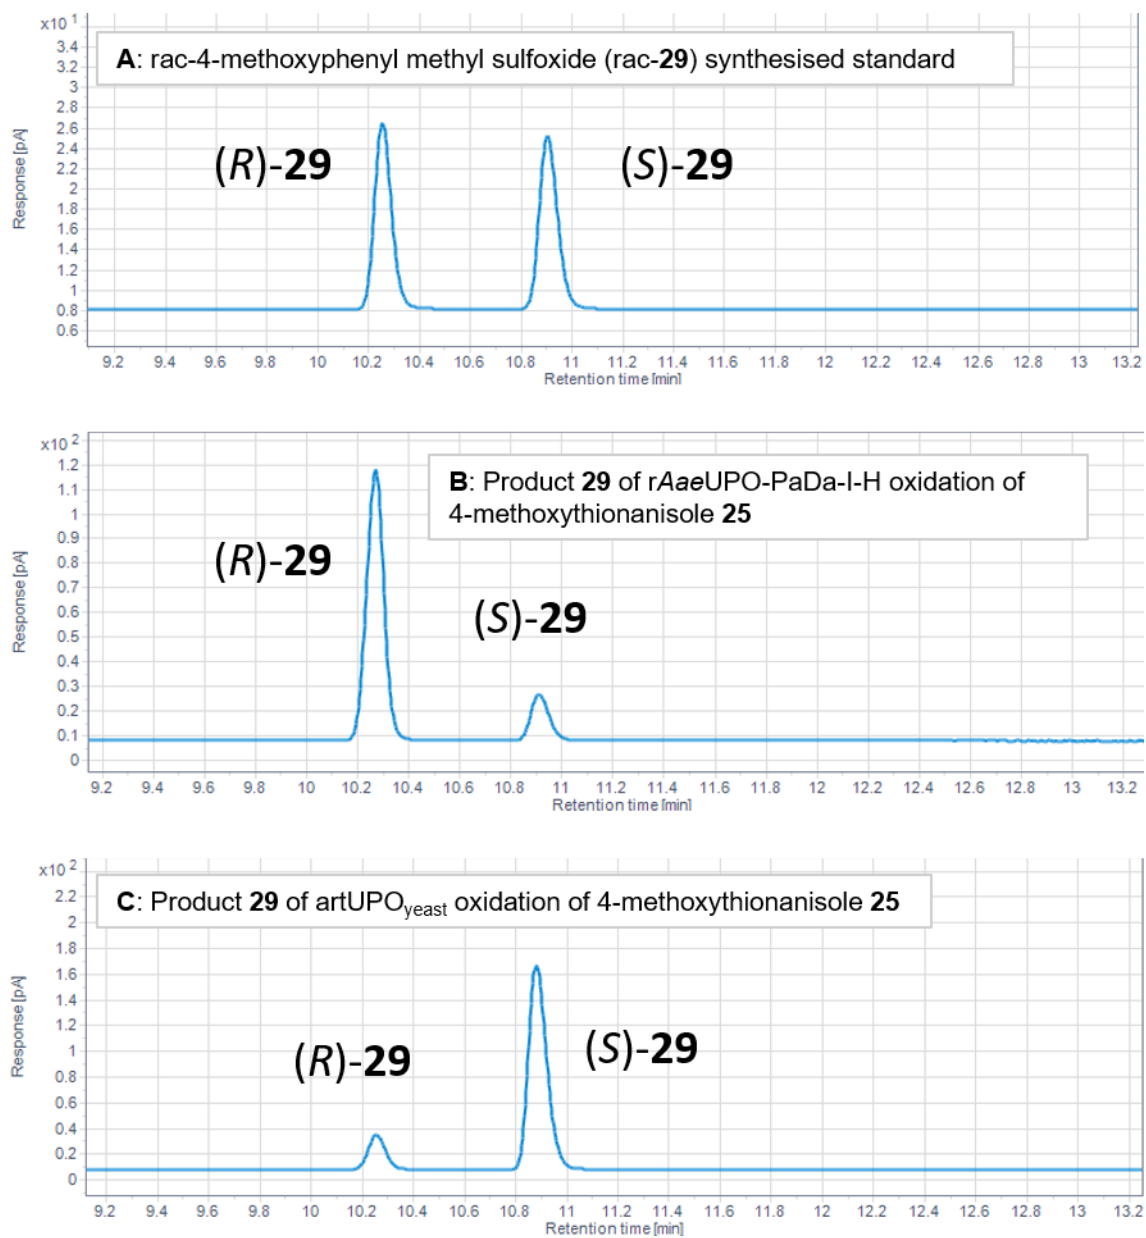

Figure S21. Chiral separation of enantiomers of 29.

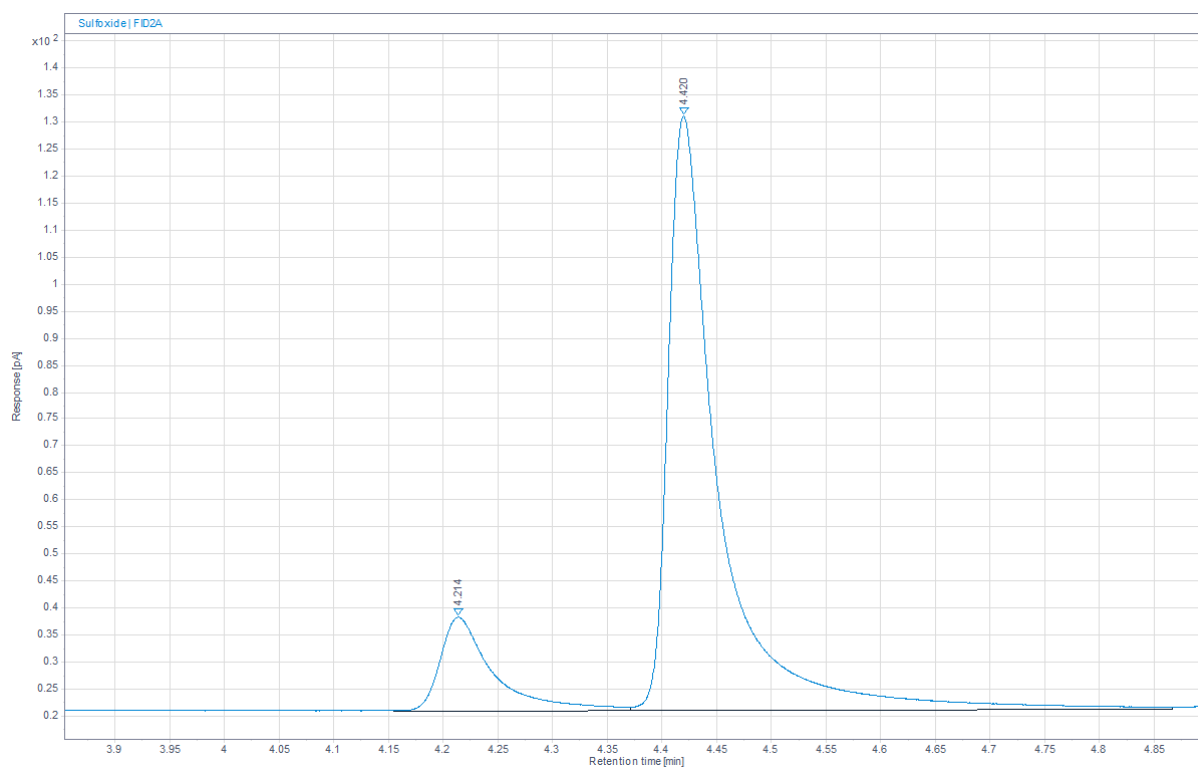

**Figure S22.** Chiral separation of enantiomers of **27** produced by artUPO<sub>bact</sub>.
